# Supplementary material
Source: PubMed Central journal article supplement (PMC6966250)
Supplement: Onyeador_Supplemental_Tables.pdf [file Onyeador_Supplemental_Tables.pdf]

**Supplemental Online Material**

**Missing Data Analysis**

To assess the impact of attrition, we compared non-Black participants who were in their second-year of residency and completed all three waves to non-Black participants who were in their second-year of residency but did not complete all waves. There were no significant differences in most of the predictors, covariates, or outcomes ( $ps = .09-.87$ ). Participants who completed all three waves completed fewer hours of diversity training ( $M=11.56$ ) than those who did not complete all three waves ( $M=14.31$ ).

Table S1

|                                                  |                             | Levene's Test for Equality of Variances |             | t-test for Equality of Means |         |      |            |          |                                |      |
|--------------------------------------------------|-----------------------------|-----------------------------------------|-------------|------------------------------|---------|------|------------|----------|--------------------------------|------|
|                                                  |                             | F                                       | p           | t                            | df      | p    | Mean Diff. | SE Diff. | 95% CI of Diff.<br>Lower Upper |      |
| <b>Demographics</b>                              |                             |                                         |             |                              |         |      |            |          |                                |      |
| Wave 1 Participant Gender                        | Equal variances             | <b>9.765</b>                            | <b>.002</b> | -1.75                        | 312     | .081 | -.045      | .026     | -.097                          | .006 |
|                                                  | Equal variances not assumed |                                         |             | -1.76                        | 577.095 | .080 | -.045      | .026     | -.096                          | .005 |
| Wave 1 Participant Race                          | Equal variances             | <b>4.565</b>                            | <b>.033</b> | -.70                         | 3132    | .484 | -.059      | .084     | -.223                          | .105 |
|                                                  | Equal variances not assumed |                                         |             | -.68                         | 563.838 | .499 | -.059      | .086     | -.228                          | .111 |
| Wave 2 Participant Family Income                 | Equal variances             | 3.253                                   | .071        | -1.24                        | 2978    | .217 | -.120      | .097     | -.312                          | .071 |
| <b>Baseline Contact with Black People</b>        |                             |                                         |             |                              |         |      |            |          |                                |      |
| Wave 1 Amount of Contact with Black People       | Equal variances             | .028                                    | .868        | 1.08                         | 3084    | .279 | .044       | .041     | -.036                          | .124 |
| Wave 1 Favorability of Contact with Black People | Equal variances             | 2.358                                   | .125        | -1.50                        | 3081    | .133 | -.048      | .032     | -.111                          | .015 |
| <b>Medical School Contact with Black People</b>  |                             |                                         |             |                              |         |      |            |          |                                |      |
| Wave 2 Amount of Contact with Black People       | Equal variances             | 1.036                                   | .309        | .44                          | 3001    | .664 | .017       | .038     | -.058                          | .091 |
| Wave 2 Favorability of Contact with Black People | Equal variances             | .022                                    | .882        | .88                          | 2989    | .379 | .027       | .030     | -.033                          | .086 |
| <b>Residency Contact with Black People</b>       |                             |                                         |             |                              |         |      |            |          |                                |      |

|                                                                                    |                             |               |             |       |         |      |       |       |        |       |
|------------------------------------------------------------------------------------|-----------------------------|---------------|-------------|-------|---------|------|-------|-------|--------|-------|
| Wave 3 Amount of Contact with Black People                                         | Equal variances             | .001          | .980        | 1.61  | 2764    | .107 | .110  | .069  | -.024  | .246  |
| Wave 3 Favorability of Contact with Black People                                   | Equal variances             | .130          | .719        | .84   | 2757    | .403 | .046  | .055  | -.062  | .155  |
| <b>Medical School Experiences</b>                                                  |                             |               |             |       |         |      |       |       |        |       |
| Wave 2 Negative Role Modeling of Racial Bias                                       | Equal variances             | 3.238         | .072        | 1.08  | 2983    | .280 | .057  | .052  | -.046  | .160  |
| Wave 2 Perceived Welcoming Racial Climate                                          | Equal variances             | 3.769         | .052        | -.14  | 2997    | .893 | -.007 | .054  | -.113  | .098  |
| Wave 2 Hours of training-racial disparities and bias                               | Equal variances             | <b>30.529</b> | <b>.000</b> | 4.71  | 2967    | .000 | 2.747 | .583  | 1.604  | 3.890 |
|                                                                                    | Equal variances not assumed |               |             | 3.98  | 385.353 | .000 | 2.747 | .690  | 1.390  | 4.104 |
| <b>Residency School Experiences</b>                                                |                             |               |             |       |         |      |       |       |        |       |
| Wave 3 Negative Role Modeling of Racial Bias                                       | Equal variances             | .034          | .853        | -.36  | 2751    | .716 | -.055 | .151  | -.351  | .241  |
| Wave 3 Perceived Welcoming Racial Climate                                          | Equal variances             | .733          | .392        | .95   | 2768    | .342 | .101  | .106  | -.107  | .308  |
| Wave 3 Hours of training-racial disparities and bias                               | Equal variances             | .892          | .345        | .79   | 2582    | .430 | .608  | .770  | -.902  | 2.117 |
| <b>Explicit Attitudes toward Black and White People (FT = Feeling Thermometer)</b> |                             |               |             |       |         |      |       |       |        |       |
| Wave 1 FT toward Black People                                                      | Equal variances             | 1.159         | .282        | .01   | 3083    | .991 | .012  | 1.031 | -2.009 | 2.033 |
| Wave 1 FT toward White People                                                      | Equal variances             | 1.954         | .162        | -1.10 | 3082    | .273 | -     | .934  | -2.856 | .808  |
|                                                                                    |                             |               |             |       |         |      | 1.023 |       |        |       |
| Wave 2 FT toward Black People                                                      | Equal variances             | .002          | .962        | .11   | 3008    | .910 | .133  | 1.185 | -2.189 | 2.456 |
| Wave 2 FT toward White People                                                      | Equal variances             | .089          | .766        | -.22  | 3010    | .830 | -.241 | 1.121 | -2.439 | 1.956 |
| Wave 3 FT toward Black People                                                      | Equal variances             | .058          | .810        | -.83  | 2736    | .405 | -     | 2.393 | -6.686 | 2.698 |
|                                                                                    |                             |               |             |       |         |      | 1.993 |       |        |       |
| Wave 3 FT toward White People                                                      | Equal variances             | .183          | .669        | -.89  | 2740    | .374 | -     | 2.266 | -6.456 | 2.430 |
|                                                                                    |                             |               |             |       |         |      | 2.013 |       |        |       |
| <b>Pro-White Implicit Bias</b>                                                     |                             |               |             |       |         |      |       |       |        |       |
| Wave 1 Pro-White IAT                                                               | Equal variances             | .763          | .382        | -.43  | 3073    | .664 | -.010 | .022  | -.053  | .034  |
| Wave 2 Pro-White IAT                                                               | Equal variances             | .034          | .855        | -.65  | 2941    | .518 | -.016 | .025  | -.066  | .033  |
| Wave 3 Pro-White IAT                                                               | Equal variances             | 1.051         | .305        | .30   | 2674    | .762 | .015  | .049  | -.081  | .111  |

This table reports the results of the preregistered analyses predicting explicit and implicit bias during residency (Wave 3). The effect of diversity training was not preregistered and is therefore exploratory. The main difference between the analyses is that the full model does not account for Wave 2 bias. The results of the individual models are the same as those reported in the main text. The only difference between the results reported in the main text and the ones that follow is that Wave 1 quantity of contact with Black people is related to less implicit bias at Wave 3 when Wave 2 implicit bias is omitted from the model. As in the main text, Wave 2 quality of contact with Black people is related to less explicit and implicit bias at Wave 3.

Table S2

*Contact, Negative Role Modeling, Climate and Diversity Training in Medical School as Predictors of Explicit and Implicit Bias against Black people in Second Year of Residency*

| Predictors                                                | Explicit Bias                 |            |                 |                         |            |                 | Implicit Bias                 |            |                 |                         |            |             |
|-----------------------------------------------------------|-------------------------------|------------|-----------------|-------------------------|------------|-----------------|-------------------------------|------------|-----------------|-------------------------|------------|-------------|
|                                                           | Individual Model <sup>a</sup> |            |                 | Full Model <sup>b</sup> |            |                 | Individual Model <sup>c</sup> |            |                 | Full Model <sup>d</sup> |            |             |
|                                                           | $\beta$                       | SE         | p               | $\beta$                 | SE         | p               | $\beta$                       | SE         | p               | $\beta$                 | SE         | p           |
| Wave 2 Quality of contact with Black people <sup>e</sup>  | <b>.08</b>                    | <b>.02</b> | <b>&lt;.001</b> | <b>.07</b>              | <b>.02</b> | <b>&lt;.001</b> | <b>-.06</b>                   | <b>.02</b> | <b>.002</b>     | <b>-.05</b>             | <b>.02</b> | <b>.005</b> |
| Wave 2 Quantity of contact with Black people <sup>f</sup> | <b>.04</b>                    | <b>.02</b> | <b>.018</b>     | .02                     | .02        | .18             | -.02                          | .02        | .27             | -.02                    | .02        | .43         |
| Wave 2 Perceived welcoming racial climate                 | <b>.04</b>                    | <b>.02</b> | <b>.023</b>     | .01                     | .02        | .62             | -.01                          | .02        | .62             | .02                     | .02        | .39         |
| Wave 2 Observed role modeling of racial bias              | -.03                          | .01        | .081            | -.01                    | .02        | .38             | .02                           | .02        | .34             | .02                     | .02        | .44         |
| Wave 2 Hours of diversity training                        | .00                           | .02        | .86             | -.01                    | .02        | .63             | -.00                          | .02        | .93             | .00                     | .02        | .89         |
| Wave 1 Quality of contact with Black people <sup>g</sup>  | <b>.05</b>                    | <b>.01</b> | <b>&lt;.001</b> | <b>.03</b>              | <b>.01</b> | <b>.019</b>     | <b>-.06</b>                   | <b>.02</b> | <b>&lt;.001</b> | <b>-.04</b>             | <b>.02</b> | <b>.022</b> |
| Wave 1 Quantity of contact with Black people <sup>h</sup> | <b>.05</b>                    | <b>.02</b> | <b>.003</b>     | .03                     | .02        | .093            | <b>-.06</b>                   | <b>.02</b> | <b>&lt;.001</b> | <b>-.04</b>             | <b>.02</b> | <b>.039</b> |
| ICC(s)                                                    | 1.1e-20 - 9.9e-15             |            |                 | 1.8e-17                 |            |                 | 6.0e-16 - 1.4e-10             |            |                 | 1.1e-13                 |            |             |
| R <sup>2</sup>                                            |                               |            |                 | .521268                 |            |                 |                               |            |                 | .1242011                |            |             |

*Note.* All predictors and dependent variables have been standardized. Each row reports a standardized slope ( $\beta$ ), the standard error of that slope, and *p*-value. All models include a random intercept by school and account for the effect of stratum as a categorical predictor. All reported values are based on pooled estimates across multiple imputations. Bolded values are statistically significant.
